# Supplementary material
Source: ML conference proceedings conference paper supplement (https://openreview.net/forum?id=8YEB51L_vwV)
Supplement: supplementary_material [file attachment]

- [33] Schneider, N.; Stiefl, N.; Landrum, G. A. What's what: The (nearly) definitive guide to reaction role assignment. *Journal of chemical information and modeling* **2016**, *56*, 2336–2346.
- [34] Thakkar, A.; Reymond, J.-L. Automatic Extraction of Reaction Templates for Synthesis Prediction. *CHIMIA* **2022**, *76*, 294–294.
- [35] Schwaller, P.; Hoover, B.; Reymond, J.-L.; Strobelt, H.; Laino, T. Extraction of organic chemistry grammar from unsupervised learning of chemical reactions. *Science Advances* **2021**, *7*, eabe4166.
- [36] Saini, K.; Ramanathan, V. Predicting odor from molecular structure: a multi-label classification approach. *Scientific reports* **2022**, *12*, 1–11.
- [37] Maser, M. R.; Cui, A. Y.; Ryou, S.; DeLano, T. J.; Yue, Y.; Reisman, S. E. Multilabel classification models for the prediction of cross-coupling reaction conditions. *Journal of Chemical Information and Modeling* **2021**, *61*, 156–166.

## A Appendix

### A.1 Random seeds for training

NeuralSym and ChemBERTa classification models were trained using the set of seeds shown in Table A2, with a constant set of hyperparameters but varying the loss function.

|         |         |         |         |         |
|---------|---------|---------|---------|---------|
| 7137799 | 129388  | 7971049 | 813804  | 6215678 |
| 9672708 | 131184  | 9718656 | 3685980 | 839341  |
| 7687853 | 3472862 | 3928806 | 3347752 | 8066535 |

Table A2: All the trained NeuralSym and ChemBERTa models were trained on this set of seeds.

### A.2 Other DTK distributions.

In the context of differentiable top-k loss functions, we define a *pure k training approach* as that where a single k is given maximum importance, i.e.  $P_K(k) = 1$ . We experimented with such strategies for  $k$  between 1 and 5 with the NeuralSym architecture, and report the obtained top-k accuracies in the template task for  $k$  in [1, 2, 3, 4, 5, 10, 20]. The results of this are show in Table A3.

| Loss Function         | Top- $k$ template accuracy |              |              |              |              |              |              |
|-----------------------|----------------------------|--------------|--------------|--------------|--------------|--------------|--------------|
|                       | 1                          | 2            | 3            | 4            | 5            | 10           | 20           |
| Cross entropy         | <b>40.12</b>               | 50.94        | 56.51        | 59.70        | 61.79        | 67.21        | 71.35        |
| $P_k = \{0,1,0,0,0\}$ | 39.06                      | <b>51.98</b> | <b>58.19</b> | <b>61.72</b> | <b>64.02</b> | 69.16        | 72.52        |
| $P_k = \{0,0,1,0,0\}$ | 36.31                      | 50.59        | 57.66        | 61.43        | 63.91        | 69.26        | 72.63        |
| $P_k = \{0,0,0,1,0\}$ | 31.17                      | 43.83        | 50.25        | 54.65        | 56.97        | 65.27        | 70.39        |
| $P_k = \{0,0,0,0,1\}$ | 33.58                      | 47.85        | 55.41        | 60.00        | 63.05        | <b>69.39</b> | <b>72.93</b> |

Table A3: Top-k accuracies on the template prediction task, from training with a pure k approach, for k between 1 and 5. The case with k=1 is just the exact cross entropy.

The results for  $k>1$  show in general a lower performance in top 1 accuracy, they do however tend to perform better for top-2 to top-5 accuracies, especially the pure approach with  $k=2$ . Top-10 and top-20 accuracies are also generally improved, and the best performance is achieved by the approach with  $k=5$ . The results show that it is in principle possible to improve in each one of these metrics, only by targeting the cost function with appropriate values of  $k$ .

### A.3 Model predictions

This section explores several cases in which top-k accuracy evaluation is inadequate for assessing the performance of models in the one-step retrosynthesis task. The attention is centered in two cases: (1) when the ground truth is not the top-1 prediction, but is found within the first top-10 predictions, and (2) when ground truth is not found within the top-10 predictions, but the model still predicts applicable templates. In our test set, we find that the first case occurs for 27.35% of the test products, while the second is the case for 15.88% of them.

#### A.3.1 Case 1: Ground truth predicted in top-( $k>1$ ).

Normal cross entropy punishes the model for not classifying the ground truth as the top-1 prediction, however in the cases in which the ground truth label is found within the top-k predictions, the model also predicts reasonable and more diverse disconnections with a higher rank (Figure A2). Normal cross entropy Loss thus hinders learning, as it prevents the model from proposing paths different than the typically incomplete ground truth.

#### A.3.2 Case 2: Ground truth is not within top-k.

In these cases, we find that the models generally lack understanding of the chemical environment, and thus the top-k predicted templates either are not applicable, or are at best risky options, as other reactions could undergo due to the presence of interfering functional groups (Figure A3).

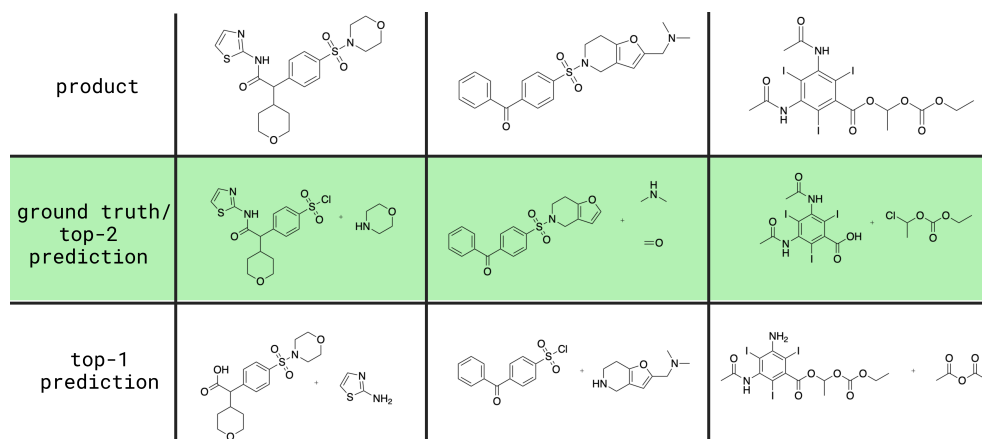

Figure A2: Example of model predictions where ground truth is not classified as the best template, but it is found within the top-4 predictions. The figure illustrates how in these cases, most of the other predicted top-4 sets of precursors corresponds to equally valid disconnections.

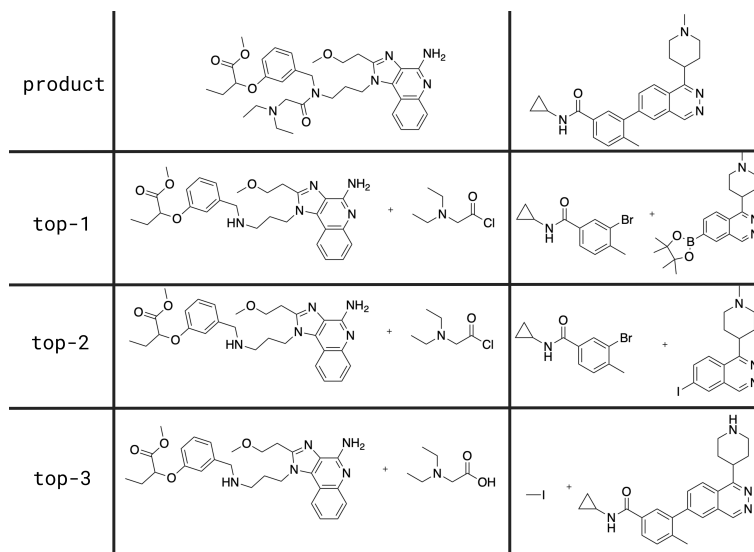

Figure A3: Model results where ground truth is not found within top-10 predictions. These cases tend to be more complex and require careful consideration of the chemical environment.
